# Supplementary material for: The regional European atmospheric transport inversion comparison, EUROCOM: first results on European-wide terrestrial carbon fluxes for the period 2006–2015
Source: Copernicus journal article supplement (doi:10.5194/acp-20-12063-2020), 2020-10-26
Supplement: Supplementary file 1 [file acp-20-12063-2020-supplement.pdf]

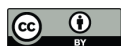

*Supplement of*

## **The regional European atmospheric transport inversion comparison, EUROCOM: first results on European-wide terrestrial carbon fluxes for the period 2006–2015**

**Guillaume Monteil et al.**

*Correspondence to:* Guillaume Monteil ([guillaume.monteil@nateko.lu.se](mailto:guillaume.monteil@nateko.lu.se))

The copyright of individual parts of the supplement might differ from the CC BY 4.0 License.

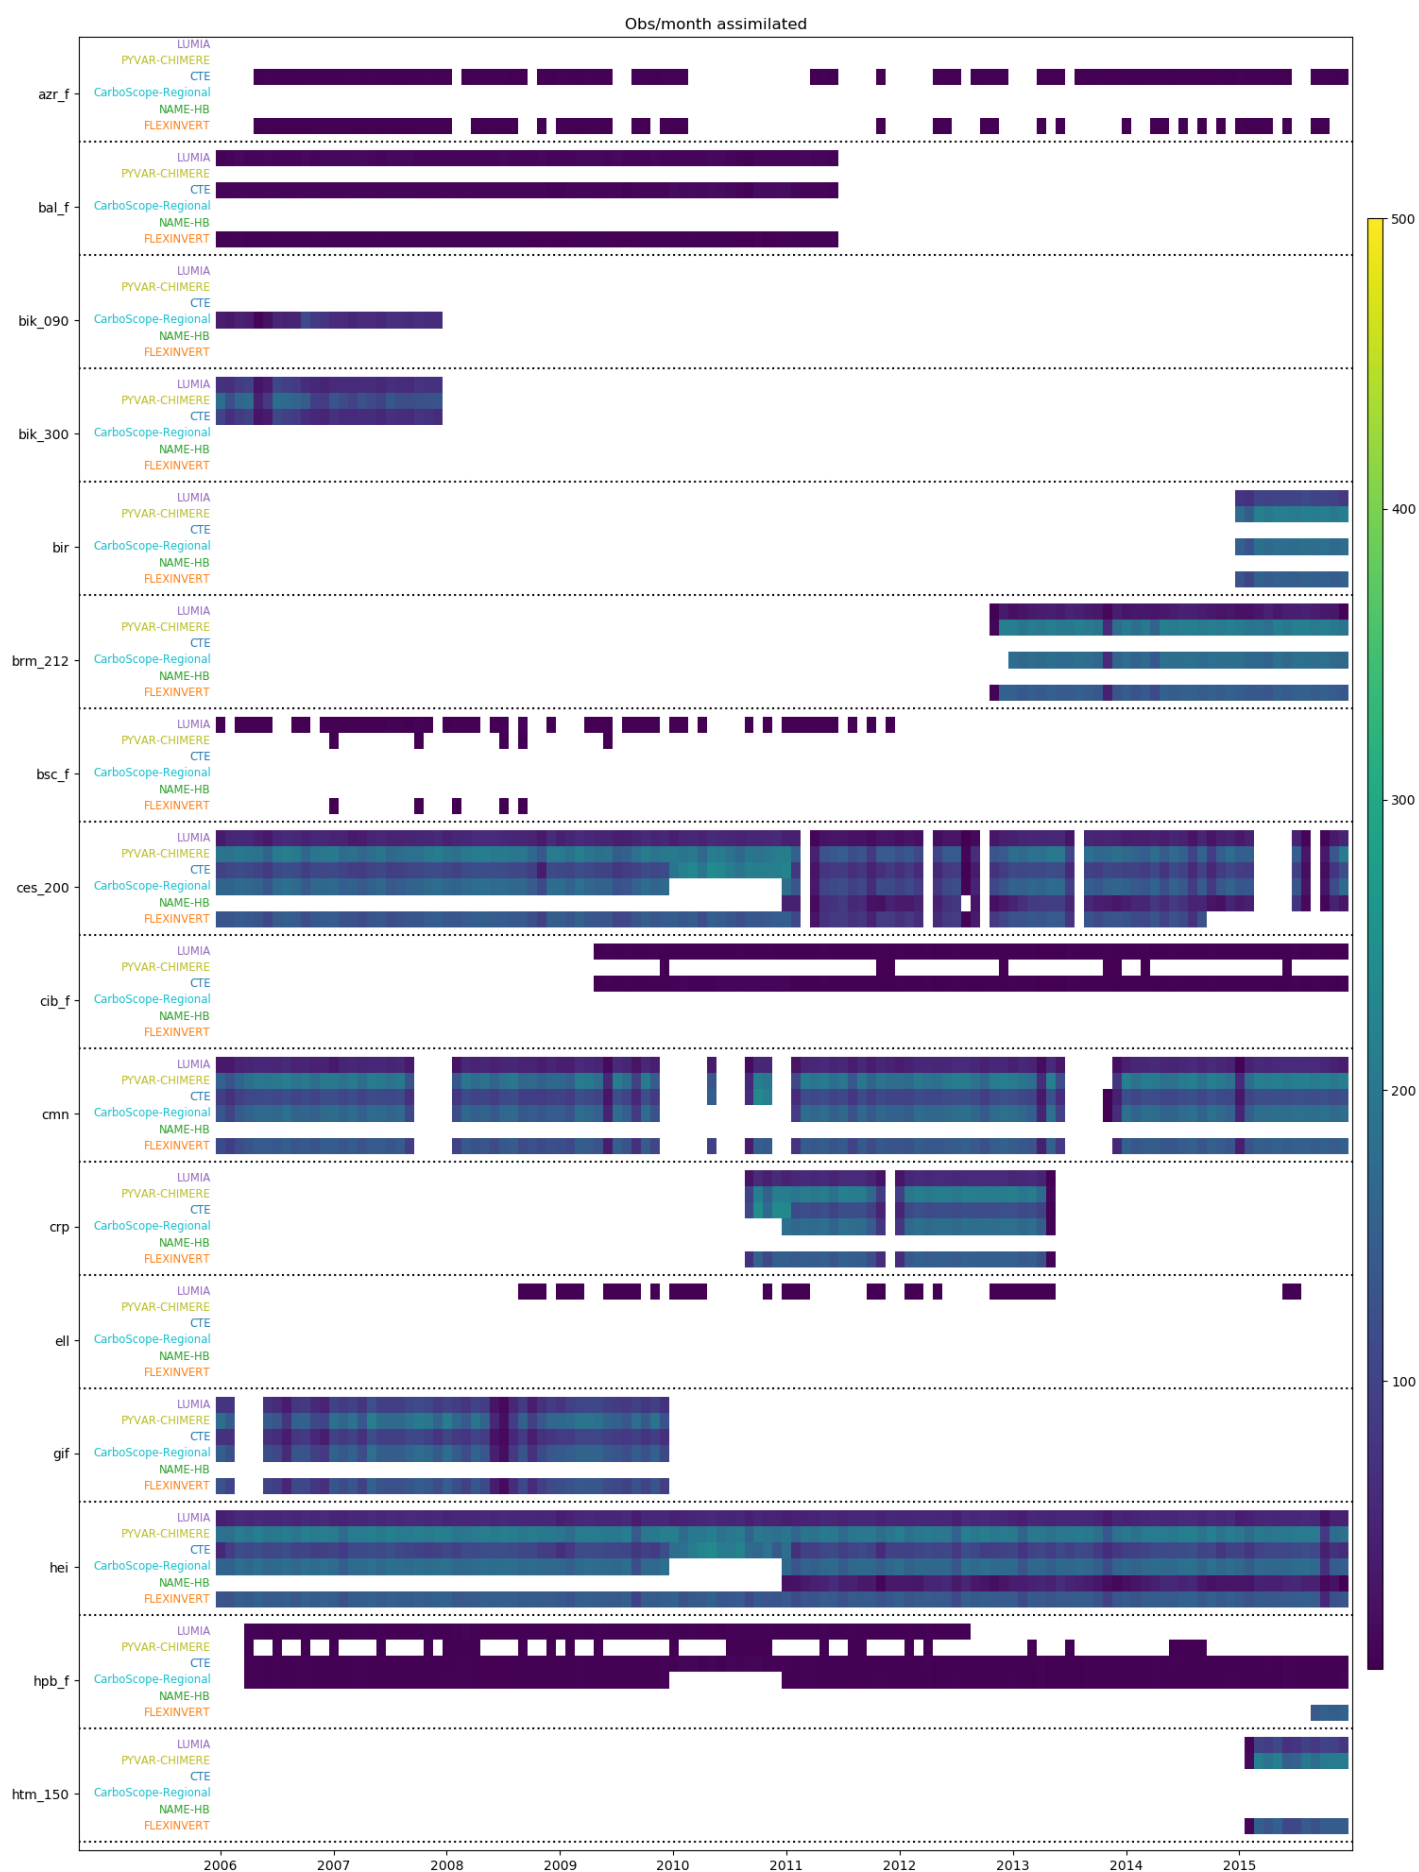

Figure S1: Number of observations assimilated every month, at each site, by the inversions (1/3)

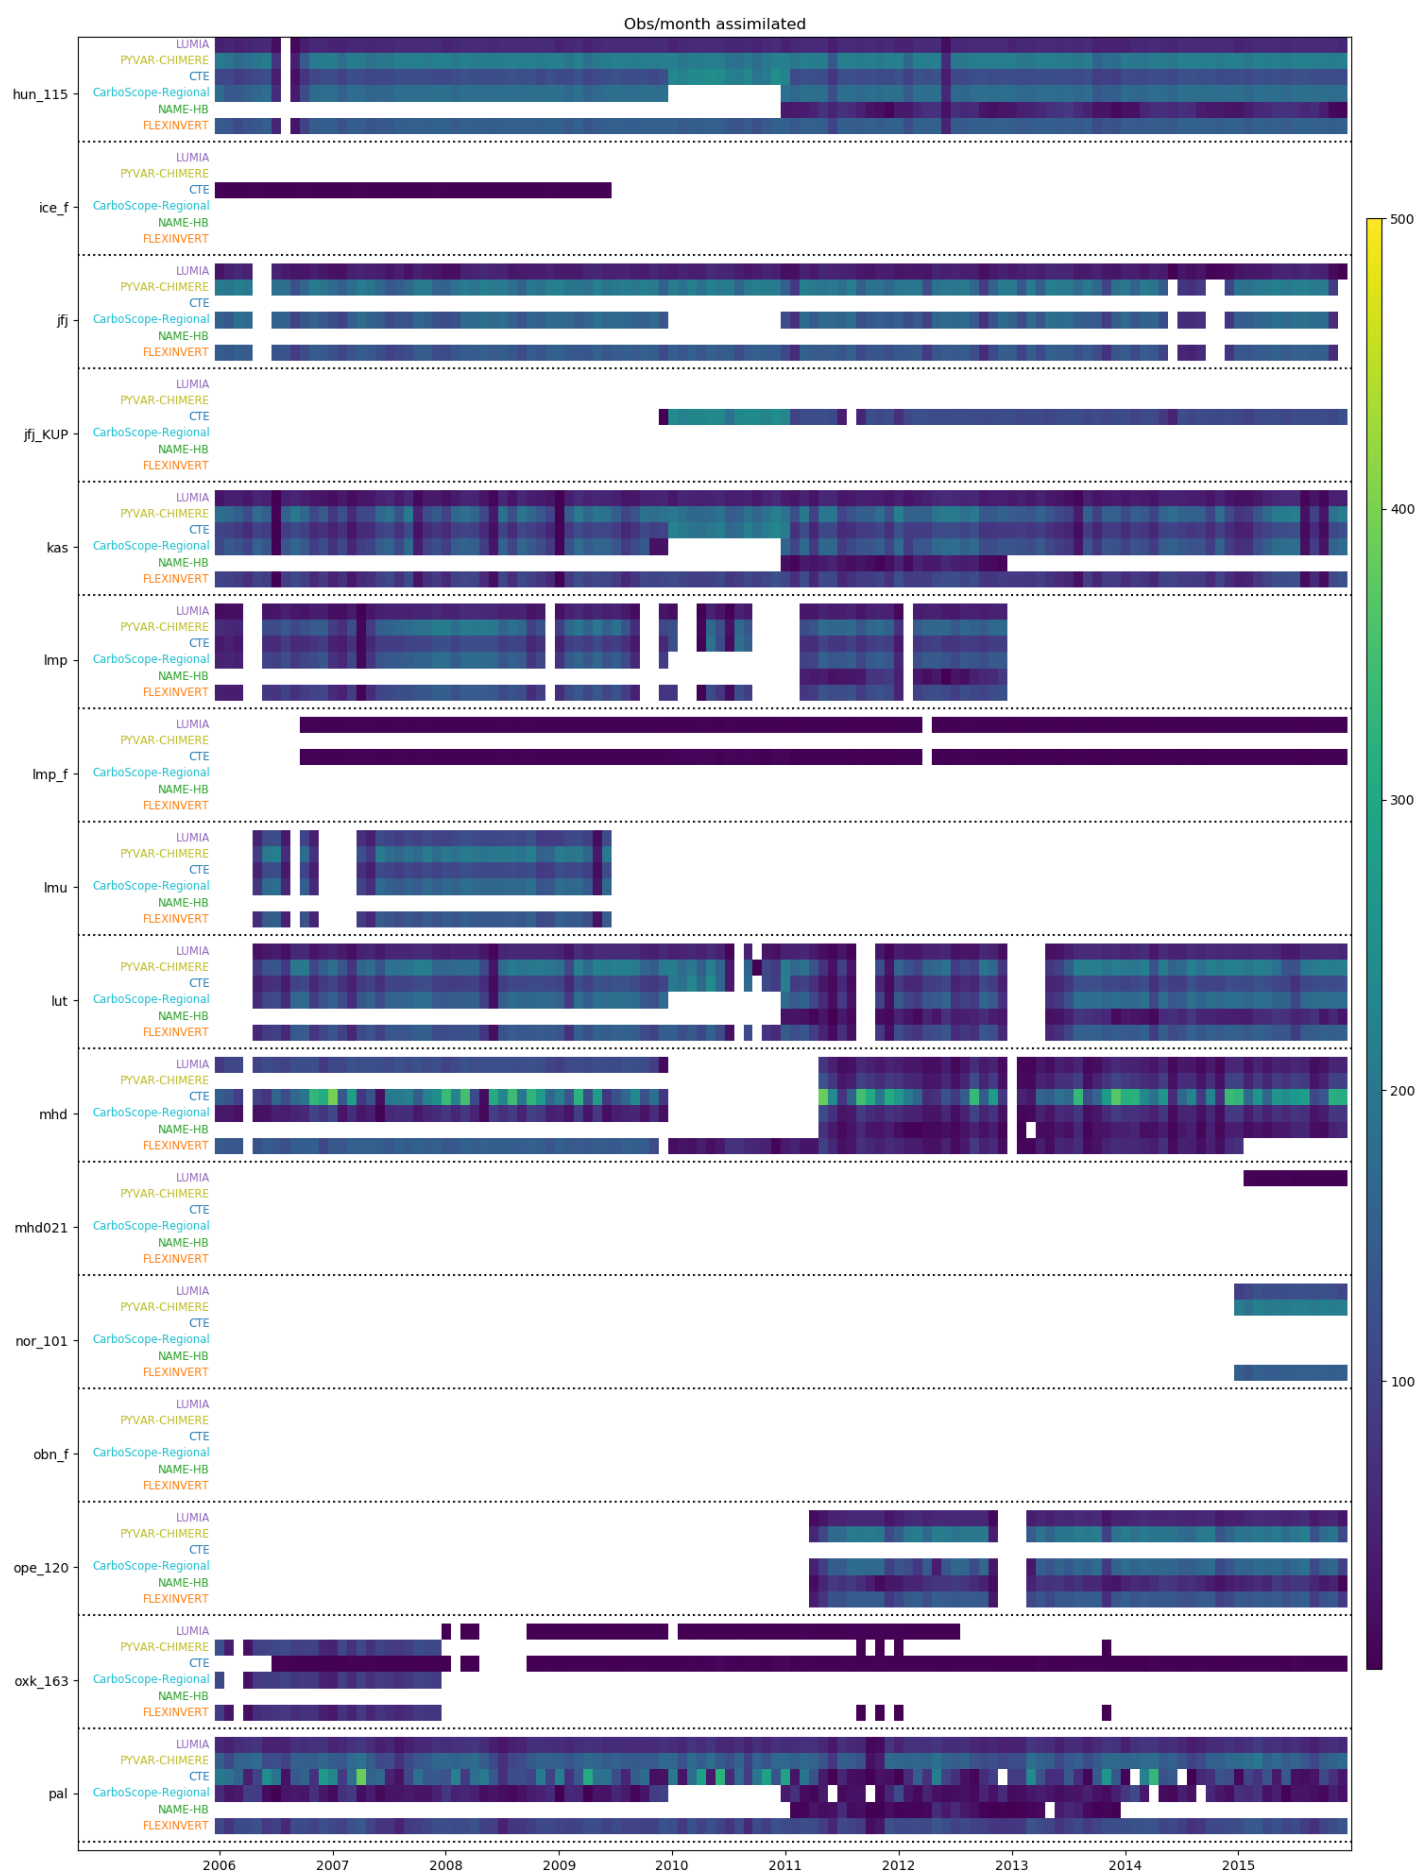

Figure S1: Number of observations assimilated every month, at each site, by the inversions (2/3)

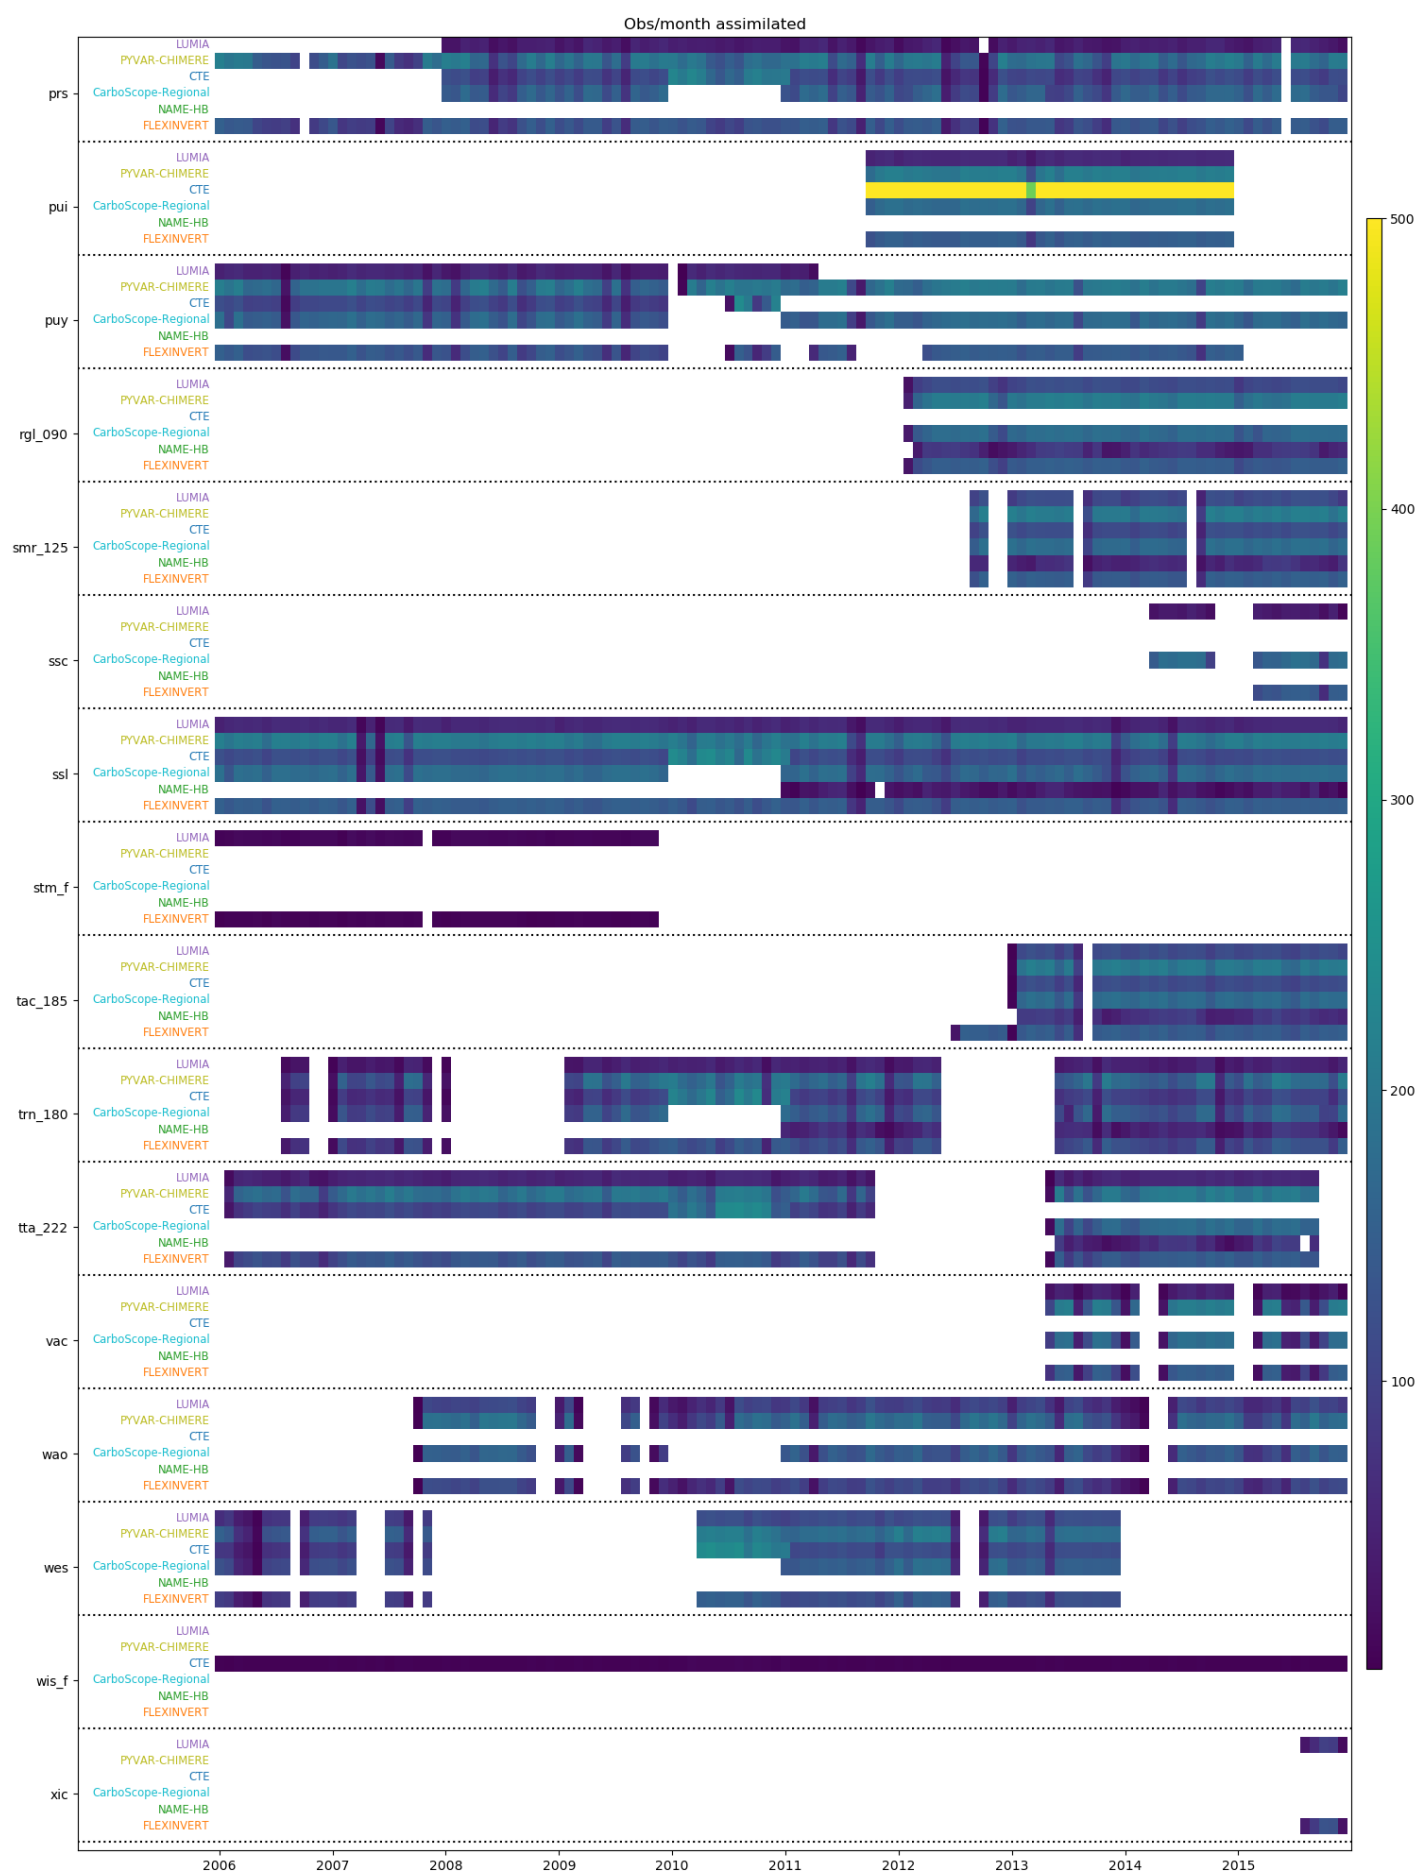

Figure S1: Number of observations assimilated every month, at each site, by the inversions (3/3)

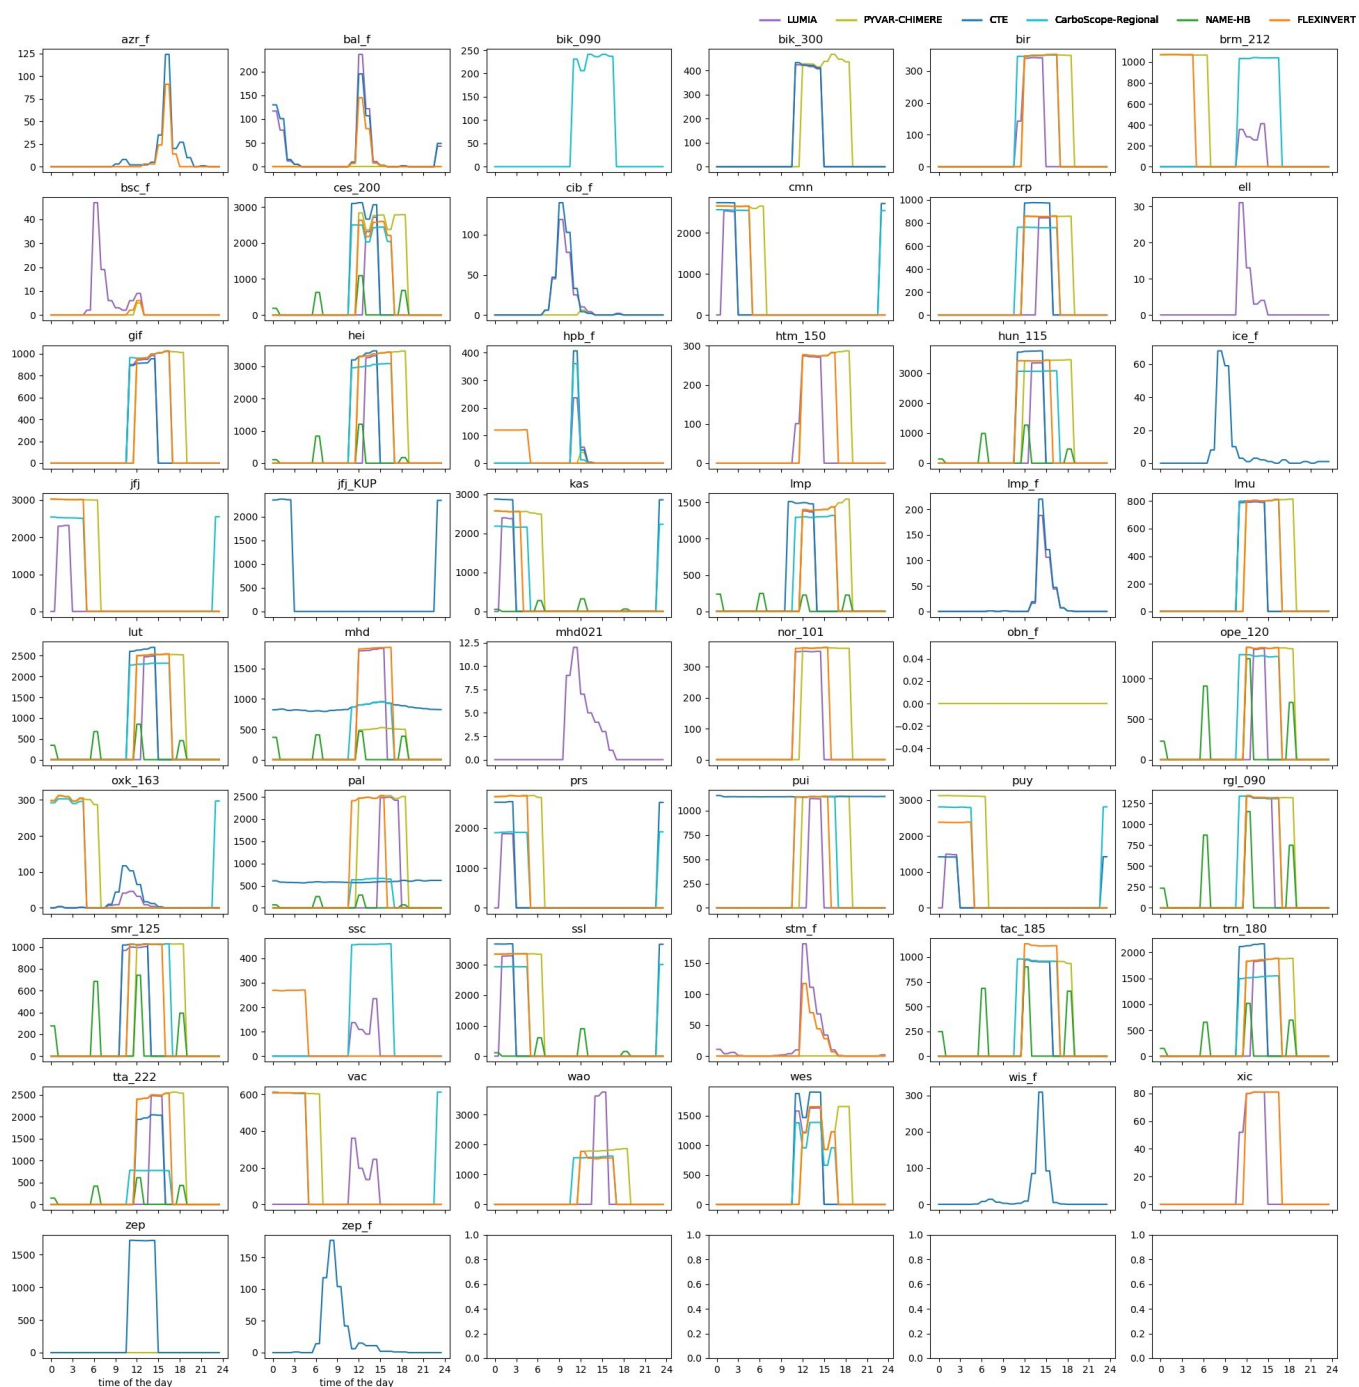

Figure S2: Number of observations assimilated by each inversion at each site and each hour of the day.



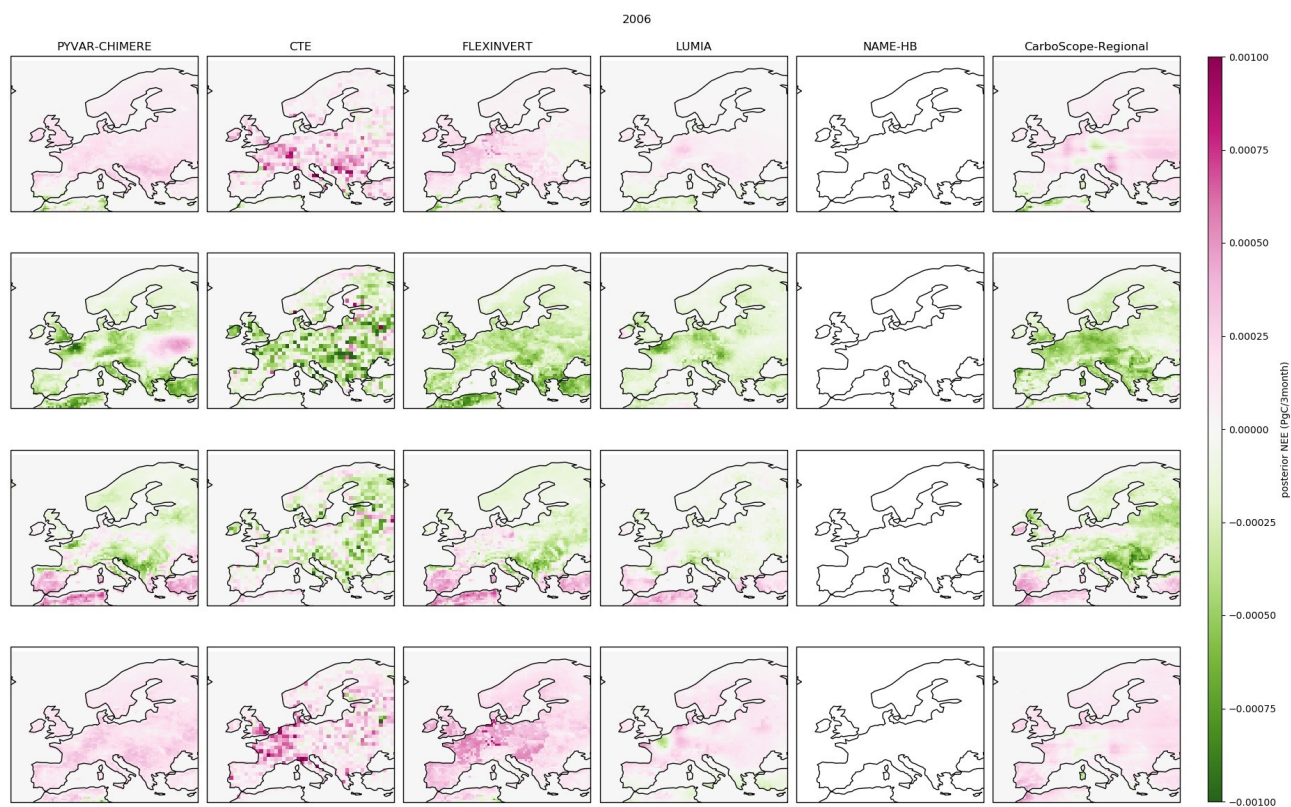

Figure S3: Posterior flux maps for the six inversions, in 3-monthly intervals (2006)

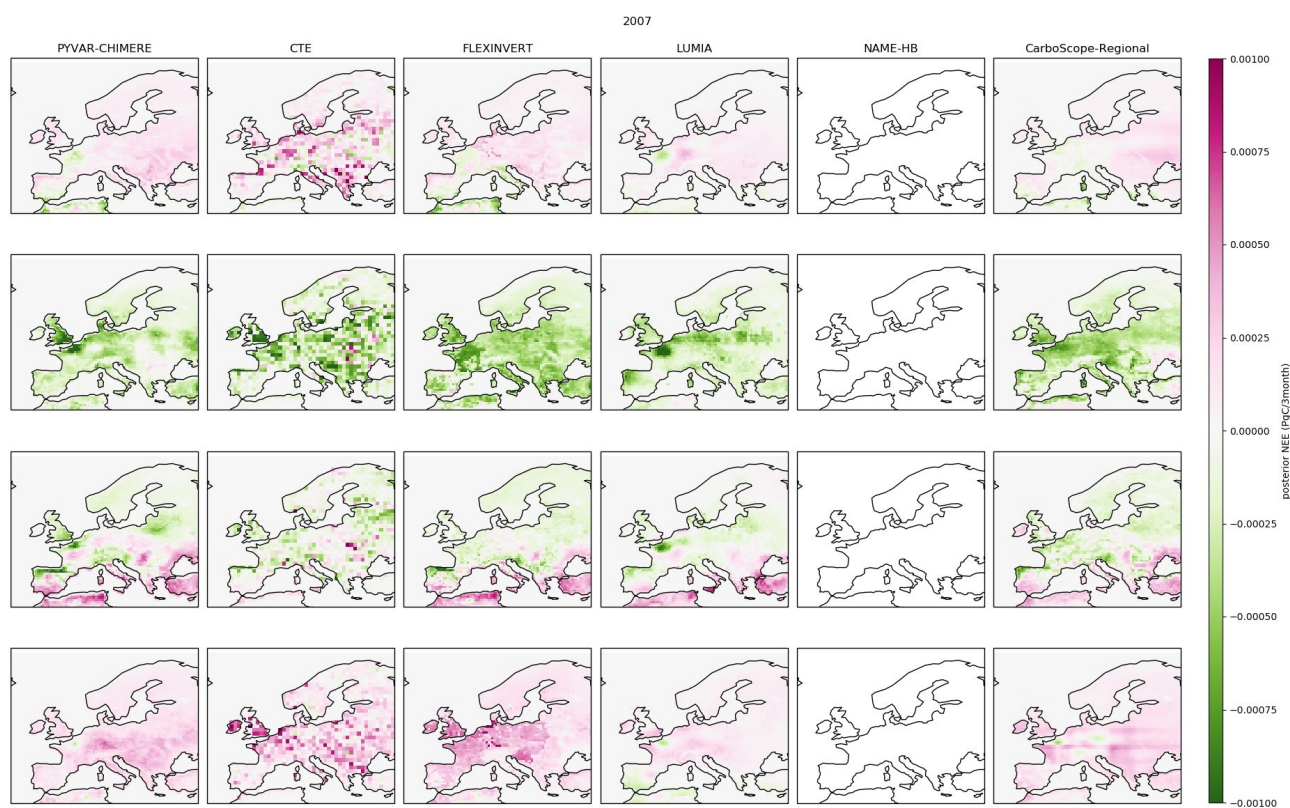

Figure S3: Posterior flux maps for the six inversions, in 3-monthly intervals (2007)

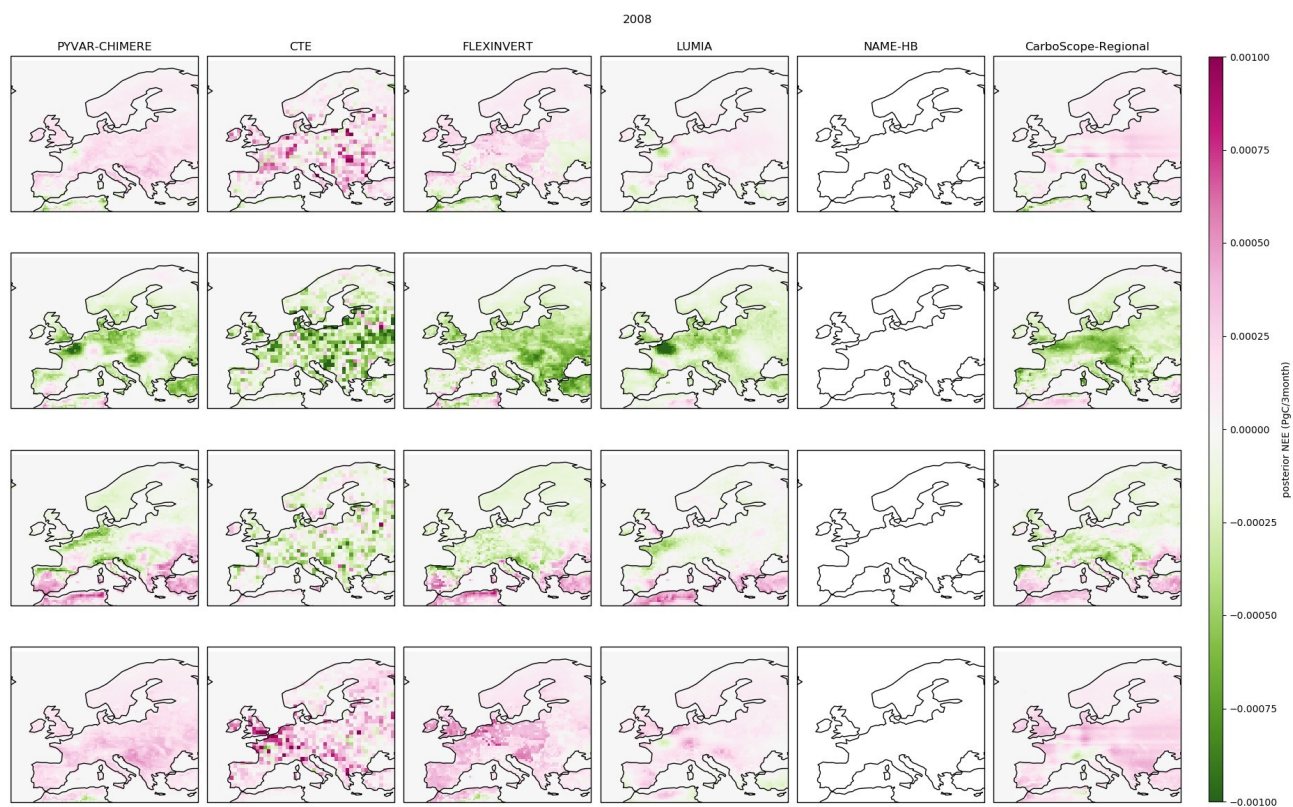

Figure S3: Posterior flux maps for the six inversions, in 3-monthly intervals (2008)

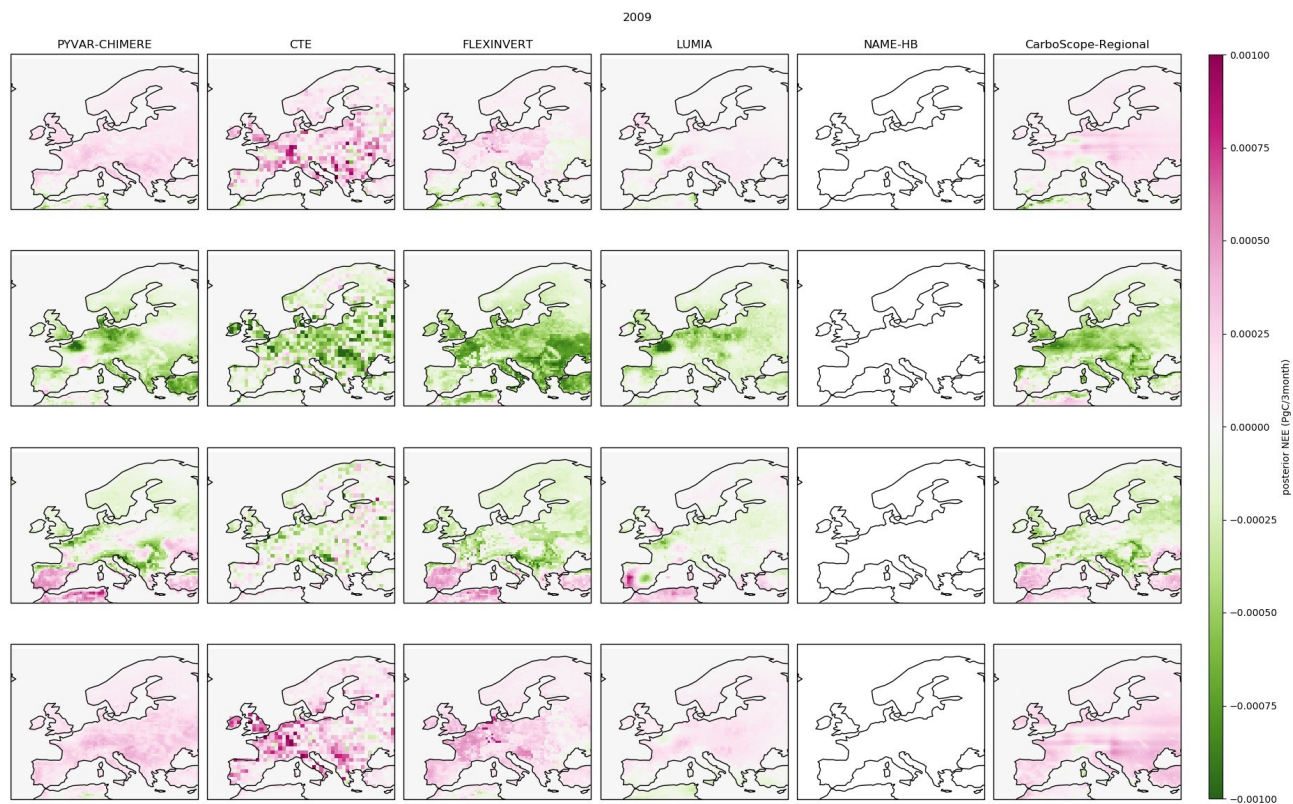

Figure S3: Figure SI3: Posterior flux maps for the six inversions, in 3-monthly intervals (2009)



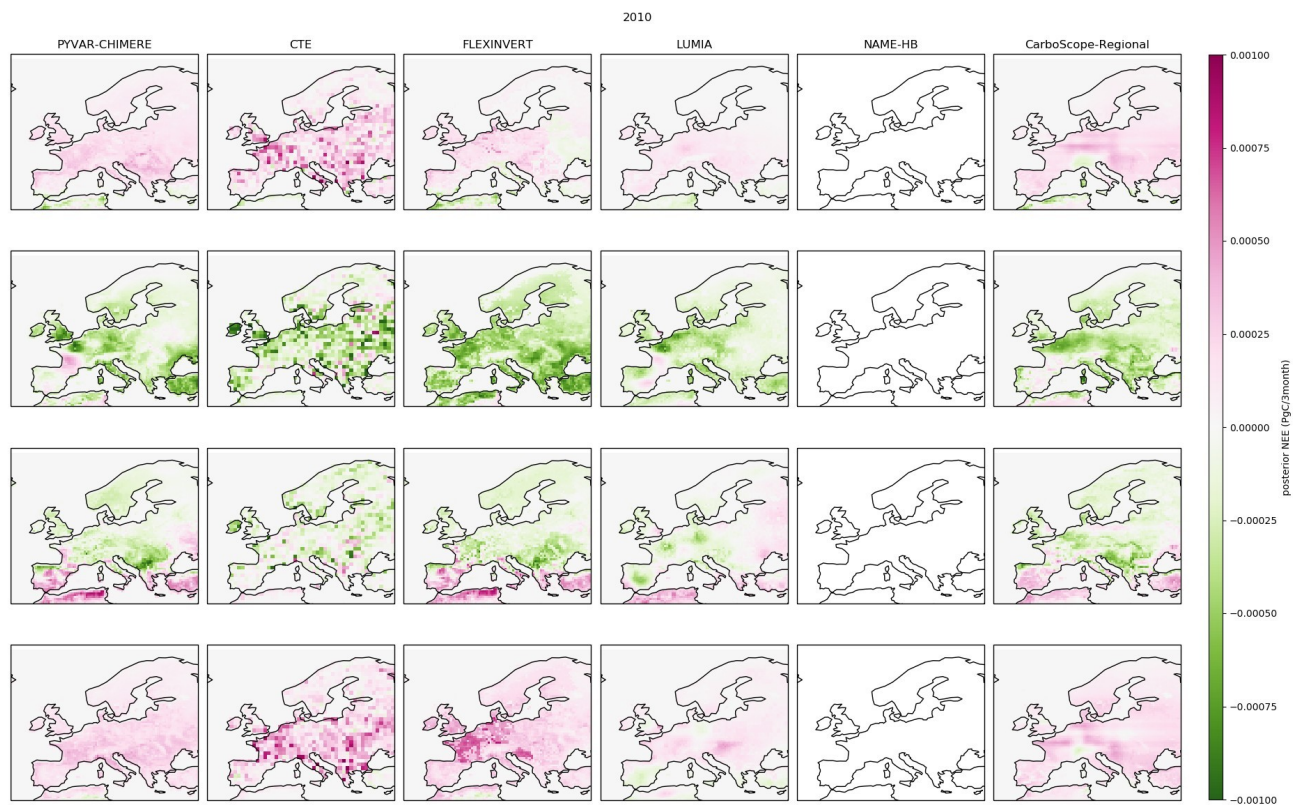

Figure S3: Posterior flux maps for the six inversions, in 3-monthly intervals (2010)

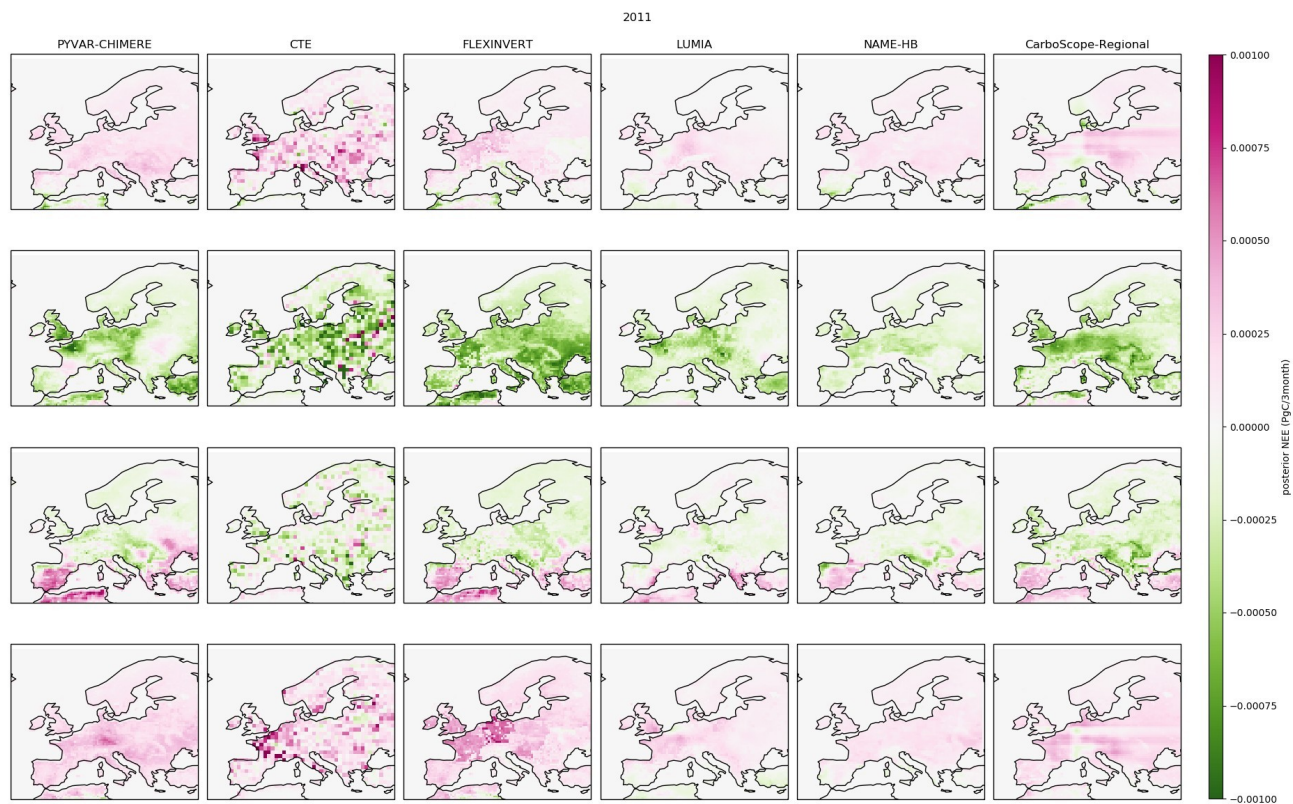

Figure S3: Posterior flux maps for the six inversions, in 3-monthly intervals (2011)



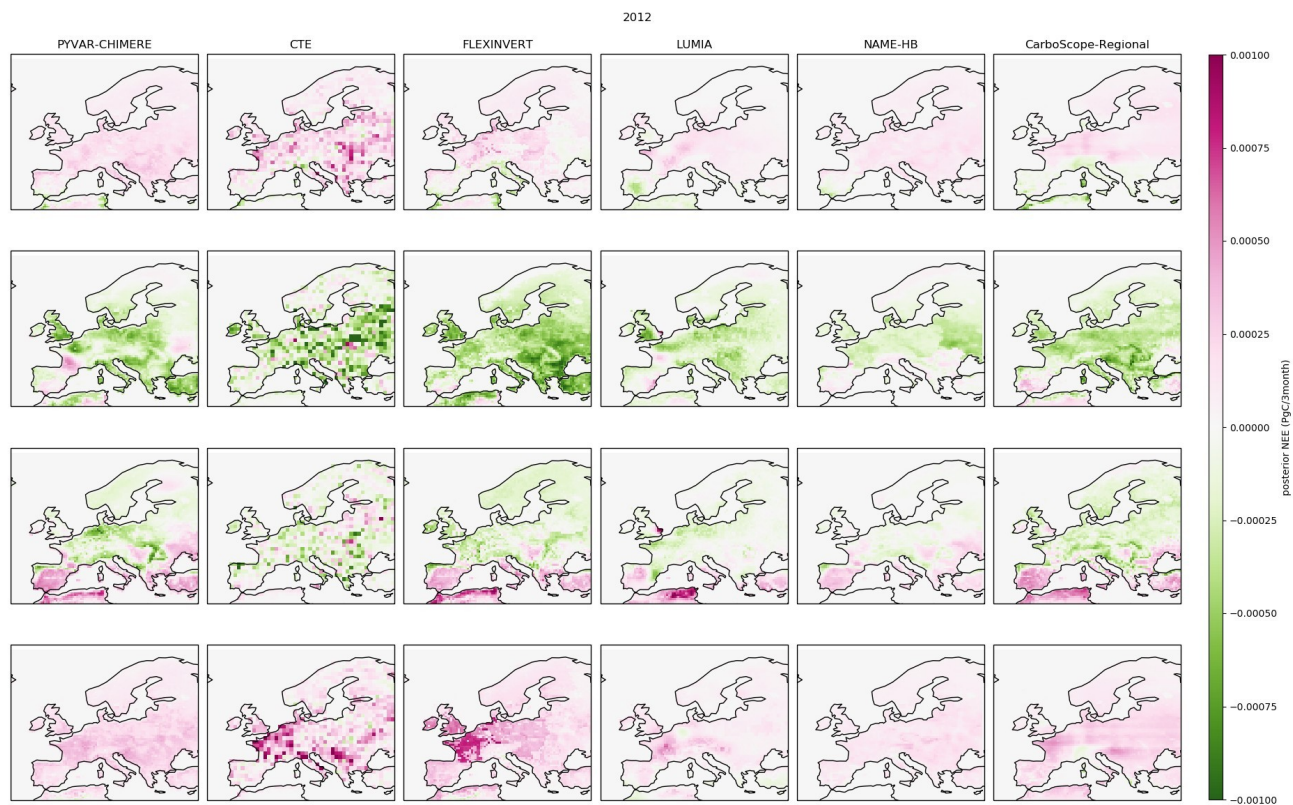

Figure S3: Posterior flux maps for the six inversions, in 3-monthly intervals (2012)

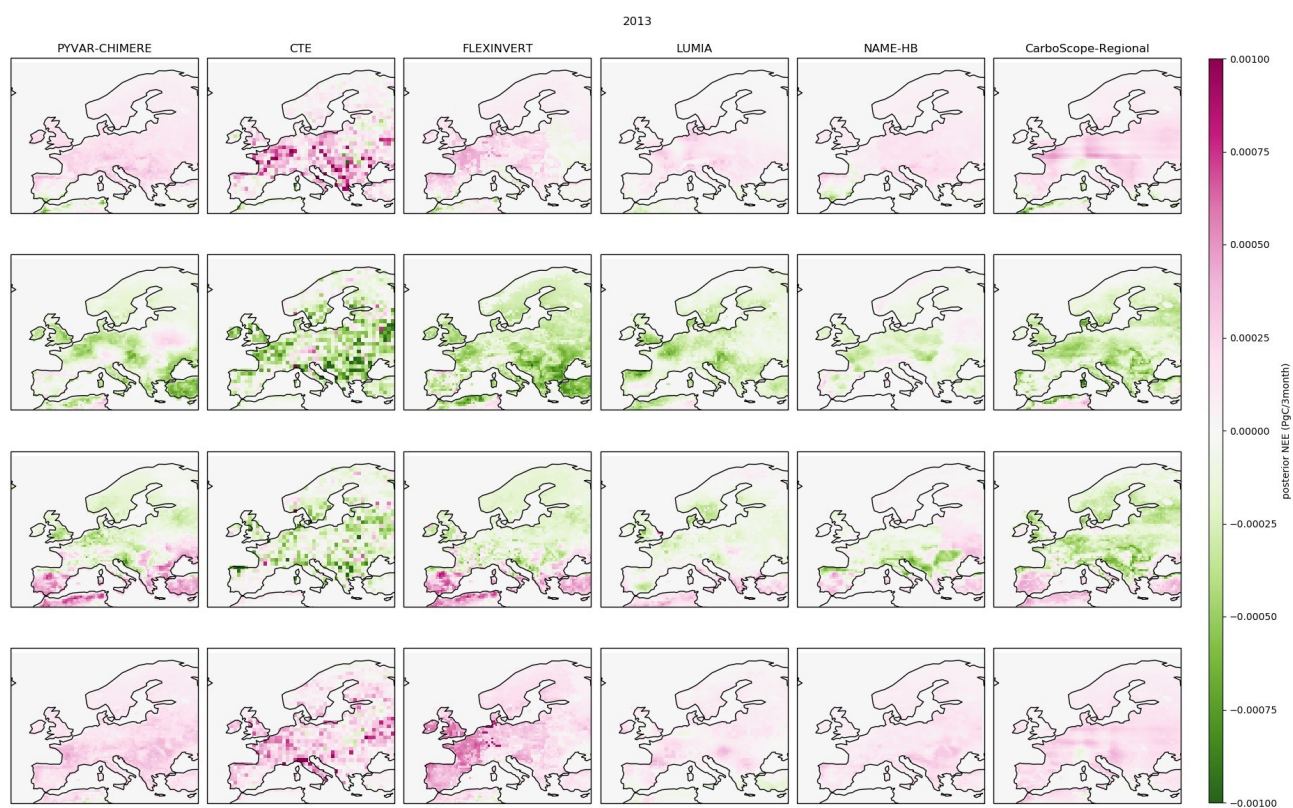

Figure S3: Posterior flux maps for the six inversions, in 3-monthly intervals (2013)

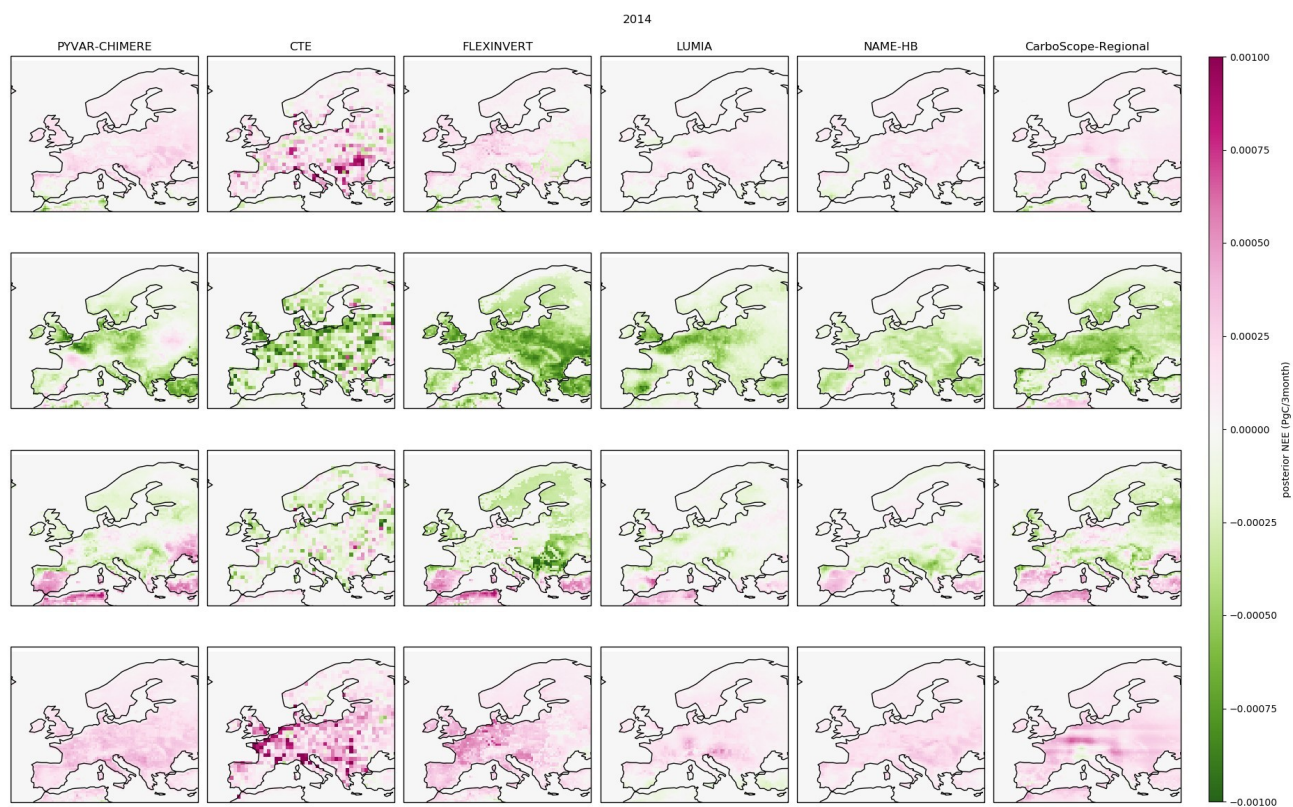

Figure S3: Posterior flux maps for the six inversions, in 3-monthly intervals (2014)

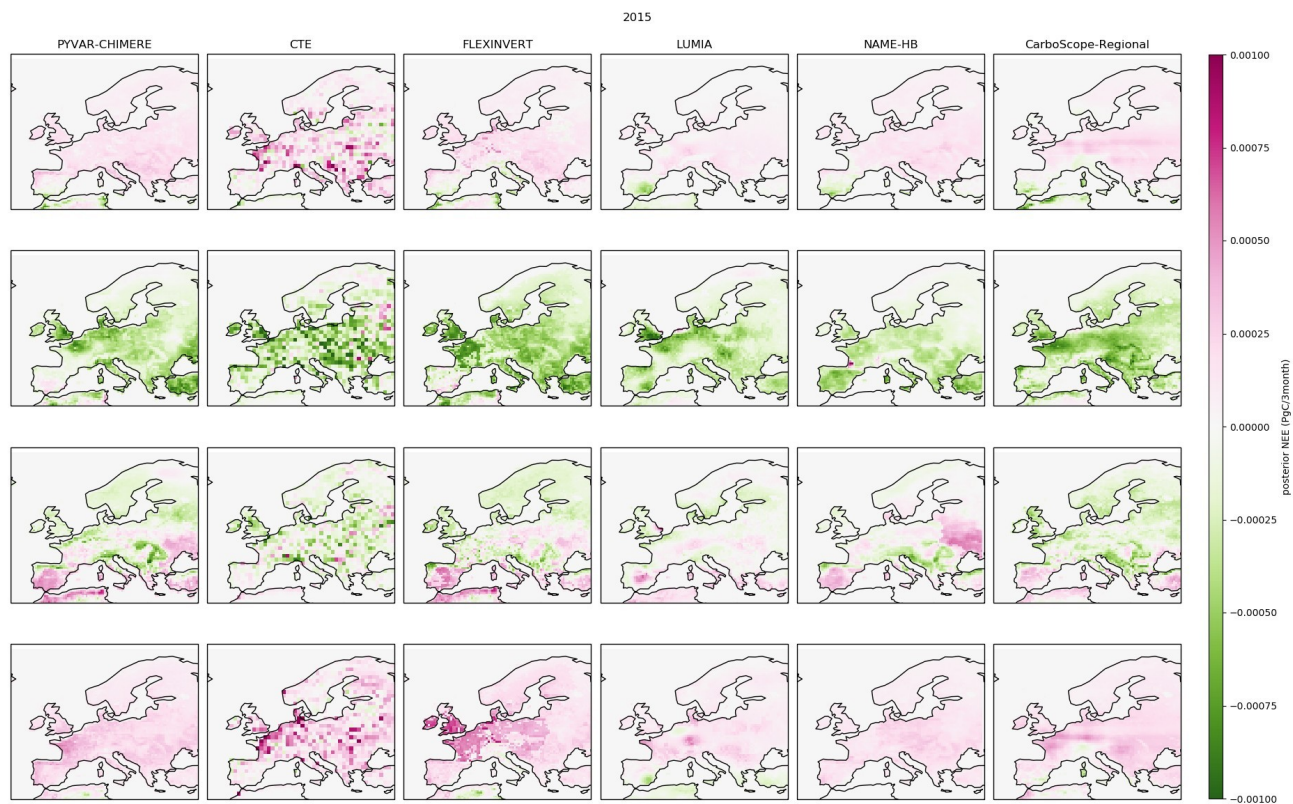

Figure S3: Posterior flux maps for the six inversions, in 3-monthly intervals (2015)



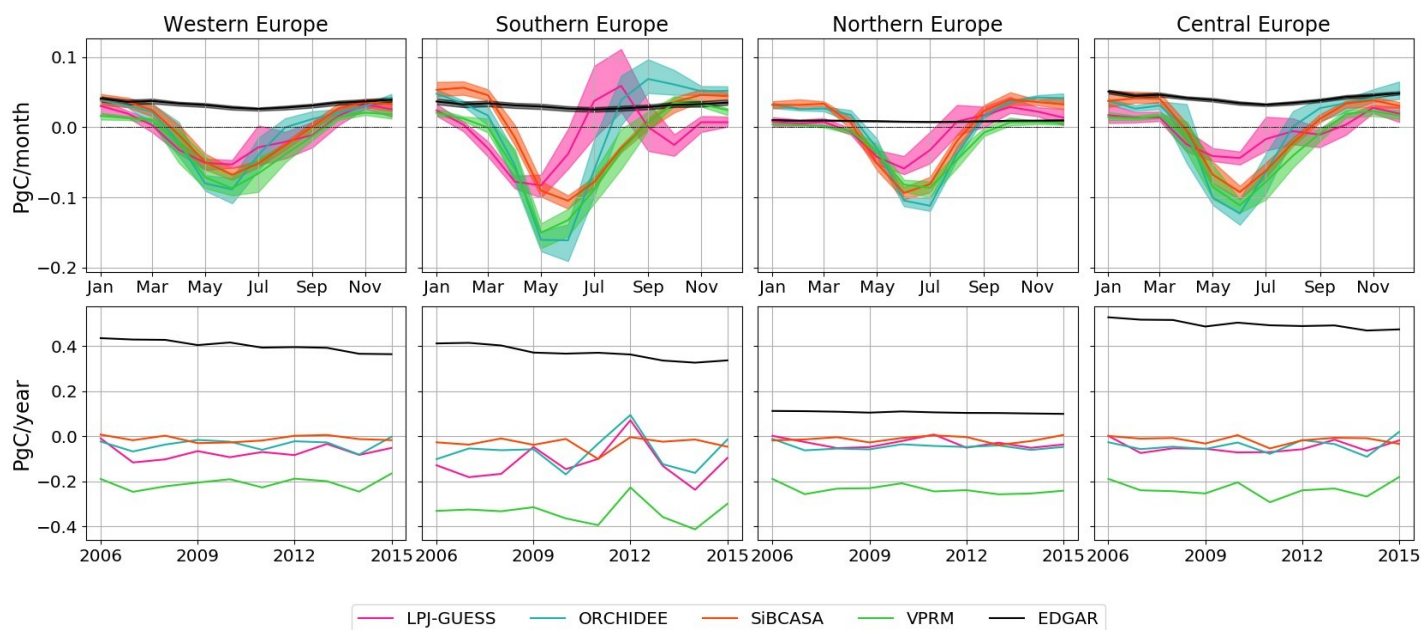

Figure S4: Regional decomposition of the prior and non-optimized fluxes shown in Figure 2 of the manuscript. The region definitions are shown on the map in Figure 1 of the main manuscript

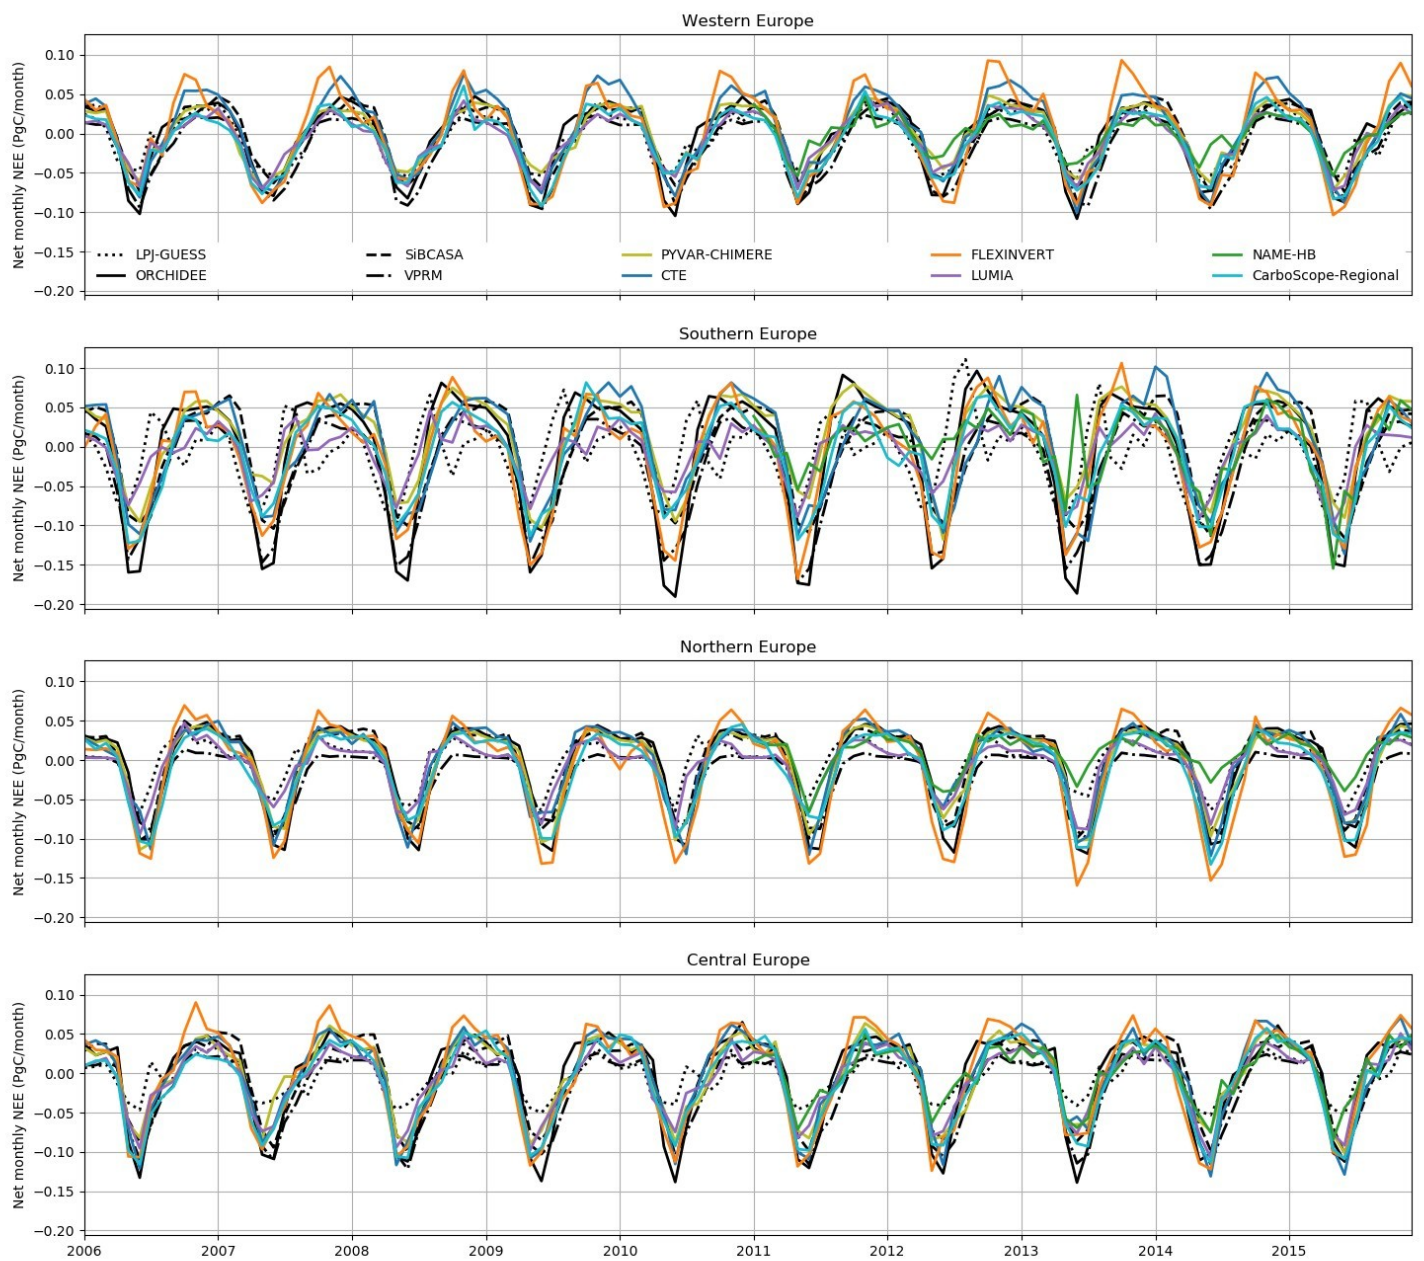

Figure S5: Monthly prior and posterior fluxes for the four regions highlighted in Figure 1 of the manuscript.
